# Supplementary material
Source: publisher site journal article supplement (https://study.sagepub.com/sites/default/files/12%20Bloomberg%203e%20Appendix%20U.pdf)
Supplement: Supplementary file 1 [file 12%20Bloomberg%203e%20Appendix%20U.pdf]

## Appendix U. Data Summary Table: Finding 1

|       | Name    | Course Work Prepared Students for Dissertation Process |                   |            |
|-------|---------|--------------------------------------------------------|-------------------|------------|
|       |         | Prepared                                               | Somewhat Prepared | Unprepared |
| 1     | Mollie  |                                                        |                   | X          |
| 2     | Hank    |                                                        |                   | X          |
| 3     | Morris  |                                                        |                   | X          |
| 4     | Debbie  |                                                        |                   | X          |
| 5     | Doris   |                                                        |                   | X          |
| 6     | Anthony |                                                        |                   | X          |
| 7     | Anne    |                                                        |                   | X          |
| 8     | Brent   |                                                        |                   | X          |
| 9     | Angela  |                                                        |                   | X          |
| 10    | Jane    |                                                        |                   | X          |
| 11    | Brad    |                                                        |                   | X          |
| 12    | Dexter  |                                                        |                   | X          |
| 13    | Frankie |                                                        |                   | X          |
| 14    | Sally   |                                                        |                   | X          |
| 15    | Shana   |                                                        |                   | X          |
| 16    | Lin     |                                                        | X                 |            |
| 17    | Carin   |                                                        |                   | X          |
| 18    | Fay     |                                                        |                   | X          |
| 19    | Connie  |                                                        |                   | X          |
| 20    | Julia   |                                                        |                   | X          |
| TOTAL |         |                                                        | 1 (5%)            | 19 (95%)   |
